# Supplementary material for: Validity of urges to smoke measures in predicting smoking relapse during treatment in primary care
Source: PubMed Central journal article supplement (PMC8660873; doi:10.1038/s41533-021-00259-3), 2021-12-09
Supplement: 41533_2021_259_MOESM1_ESM.pdf [file 41533_2021_259_MOESM1_ESM.pdf]

## SUPPLEMENTARY INFORMATION

### Supplementary Note 1: Original English and translated Dutch versions of the two urges to smoke measures; time spent with urges to smoke (TSU) and strength of urges to smoke (SUT)

#### TSU

|    | <b>Original English version<sup>1</sup></b>                                | <b>Dutch translation</b>                                              |
|----|----------------------------------------------------------------------------|-----------------------------------------------------------------------|
|    | How much of the time have you felt the urge to smoke in the past 24 hours? | Hoe vaak heeft u in de afgelopen 24 uur de drang gevoeld om te roken? |
| 6. | all of the time                                                            | continue                                                              |
| 5. | almost all of the time                                                     | bijna de hele tijd                                                    |
| 4. | a lot of the time                                                          | een groot deel van de tijd                                            |
| 3. | some of the time                                                           | een redelijk deel van de tijd                                         |
| 2. | a little of the time                                                       | een klein deel van de tijd                                            |
| 1. | not at all                                                                 | totaal niet                                                           |

#### SUT

|    | <b>Original English version<sup>1</sup></b>          | <b>Dutch translation</b>  |
|----|------------------------------------------------------|---------------------------|
|    | In general, how strong have the urges to smoke been? | Hoe sterk was deze drang? |
| 6. | extremely strong                                     | extreem sterk             |
| 5. | very strong                                          | zeer sterk                |
| 4. | strong                                               | sterk                     |
| 3. | moderate                                             | matig                     |
| 2. | slight                                               | licht                     |
| 1. | no urges                                             | geen drang                |

---

<sup>1</sup> Fidler JA, Shahab L, West R. Strength of urges to smoke as a measure of severity of cigarette dependence: comparison with the Fagerstrom Test for Nicotine Dependence and its components. *Addiction*. 2011;106(3):631-8

**Supplementary Table 1: Diagnostic parameters for urges to smoke measures as predictors of relapse during week 9-26 and week 9-52, including all possible cut-points**

| Predictor    | Week 9-26    |               |        |        |                      | Week 9-52    |               |        |        |                      |
|--------------|--------------|---------------|--------|--------|----------------------|--------------|---------------|--------|--------|----------------------|
|              | Relapsed (N) | Abstinent (N) | SN (%) | SP (%) | PPV <sup>a</sup> (%) | Relapsed (N) | Abstinent (N) | SN (%) | SP (%) | PPV <sup>b</sup> (%) |
| TSU $\geq$ 1 | 75           | 105           | 100    | 0      | 41.7                 | 100          | 80            | 100    | 0      | 55.6                 |
| TSU $\geq$ 2 | 48           | 52            | 64.0   | 50.4   | 48.0                 | 62           | 38            | 62.0   | 52.5   | 62.0                 |
| TSU $\geq$ 3 | 7            | 3             | 9.3    | 97.1   | 70.0                 | 9            | 1             | 9.0    | 98.8   | 90.0                 |
| TSU $\geq$ 4 | 1            | 2             | 1.3    | 98.1   | 33.3                 | 3            | 0             | 3.0    | 100    | 100                  |
| TSU $\geq$ 5 | 1            | 0             | 1.3    | 100    | 100                  | 1            | 0             | 1.0    | 100    | 100                  |
| TSU $\geq$ 6 | 0            | 0             | -      | -      | -                    | 0            | 0             | -      | -      | -                    |
| SUT $\geq$ 1 | 75           | 105           | 100    | 0      | 41.7                 | 100          | 80            | 100    | 0      | 47.6                 |
| SUT $\geq$ 2 | 47           | 51            | 62.7   | 51.4   | 48.0                 | 61           | 37            | 61.0   | 53.8   | 56.7                 |
| SUT $\geq$ 3 | 21           | 17            | 28.0   | 83.8   | 55.3                 | 27           | 11            | 27.0   | 86.3   | 67.7                 |
| SUT $\geq$ 4 | 6            | 1             | 8.0    | 99.0   | 85.7                 | 6            | 1             | 6.0    | 98.8   | 85.7                 |
| SUT $\geq$ 5 | 2            | 0             | 2.7    | 100    | 100                  | 2            | 0             | 2.0    | 100    | 100                  |
| SUT $\geq$ 6 | 0            | 0             | -      | -      | -                    | 0            | 0             | -      | -      | -                    |

TSU=time spent with urges (1–6=all of the time). SUT=strength of urges to smoke (1–6=extremely strong). SN=sensitivity. SP=specificity. <sup>a</sup>PPV=positive predictive value given a 42% prevalence of relapse. <sup>b</sup>PPV=positive predictive value given a 56% prevalence of relapse.
